# Supplementary material for: Human ALKBH4 Interacts with Proteins Associated with Transcription
Source: PubMed Central journal article supplement (PMC3493508; doi:10.1371/journal.pone.0049045), 2012-11-08
Supplement: pone.0049045.s001.pdf [file pone.0049045.s001.pdf]

## Bjørnstad *et al.* – Supplementary Figure S1

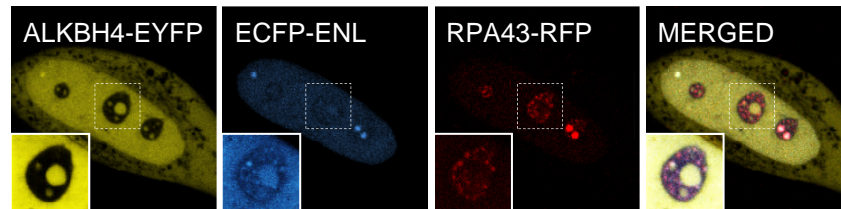

**Supplementary Figure S1. Partial co-localization of ALKBH4 and ENL with RNA Polymerase I subunit RPA43 in nucleolar speckles.** Co-expression of ALKBH4-EYFP with ECFP-ENL and RPA43-RFP in HeLa cells, as analyzed by confocal fluorescence microscopy. Insets are enlargements of boxed areas.
