# Supplementary material for: Human ALKBH4 Interacts with Proteins Associated with Transcription
Source: PubMed Central journal article supplement (PMC3493508; doi:10.1371/journal.pone.0049045), 2012-11-08
Supplement: pone.0049045.s003.pdf [file pone.0049045.s003.pdf]

## Bjørnstad *et al.*- Supplementary Table S1

**Supplementary Table S1. Primer sequences**

| <b>Primer name</b>      | <b>Primer sequence (5'-3')</b>                                    | <b>Application</b> |
|-------------------------|-------------------------------------------------------------------|--------------------|
| p300 <sub>BP</sub> -fwd | ATCGAGTACTCGAGTCATGGCCCAGGTGCAGCTGCA                              | Plasmid cloning    |
| p300 <sub>BP</sub> -rev | ACGCTACTGAATTCCTTCTTTCTTAGTTTCGTGCACTTTTCTTTA                     | Plasmid cloning    |
| NLS-fwd                 | GTCTAGACGAATTCACGATCCAAAAAAGAAGAGAAAGG                            | Plasmid cloning    |
| NLS-rev                 | TCAGCTAGGGTACCAGTACCTTTCTTTCTTTTGG                                | Plasmid cloning    |
| AF9-fwd                 | AGATTCGACTCGAGTAATGGCTAGCTCGTGTGCCGTGCAG                          | Plasmid cloning    |
| AF9-rev                 | TACGACTTGGTACCGAGGATGTTCCAGATGTTTCCAGGTAAGTC                      | Plasmid cloning    |
| ENL-fwd                 | TCCGACTACTCGAGTAATGGACAATCAGTGCACCGTCCAGG                         | Plasmid cloning    |
| ENL-rev                 | TACGACTTGGTACCGATGTGGCCACGGCCTCCAGGCA                             | Plasmid cloning    |
| YEATS-rev               | CGACATGGTACCGACACCCCGCCGGCCCGCAG                                  | Plasmid cloning    |
| ENL <sub>C</sub> -fwd   | CGACTACTCGAGTAATGGTAATGCCCGAAGGAGC                                | Plasmid cloning    |
| ALKBH4-fwd              | ACTACTGGGGATCCATGGCGGCGGCTGCCGCCGA                                | Plasmid cloning    |
| ALKBH4-FLAG-rev         | ATGTAGACGATATCTCATTTATCGTCATCGTCTTTGTAGTCGAACACGGGTCTTCCCTGGAAGGA | Plasmid cloning    |
| ALKBH7-fwd              | ACTACTGGGGATCCATGGCCGGGACTGGGCTGCTG                               | Plasmid cloning    |
| ALKBH7-FLAG-rev         | ATGTAGACGATATCTCATTTATCGTCATCGTCTTTGTAGTCGAAGCAGGCTGGGGGCGGCT     | Plasmid cloning    |
| ALKBH4-qPCR-fwd         | TTCGGGAATGCGGTTG                                                  | qPCR               |
| ALKBH4-qPCR-rev         | CCTCGATCAGCATCACTC                                                | qPCR               |
| Beta-actin-fwd          | CGTGGGGCGCCCCAGGCACCA                                             | qPCR               |
| Beta-actin-rev          | TTGGCCTTGGGGTTCAGGGGGG                                            | qPCR               |
